# Supplementary material
Source: bioRxiv or medRxiv preprint supplement (https://www.biorxiv.org/highwire/filestream/96629/field_highwire_adjunct_files/14/314922-8.pdf)

**a**

FtsZ abundance/total protein

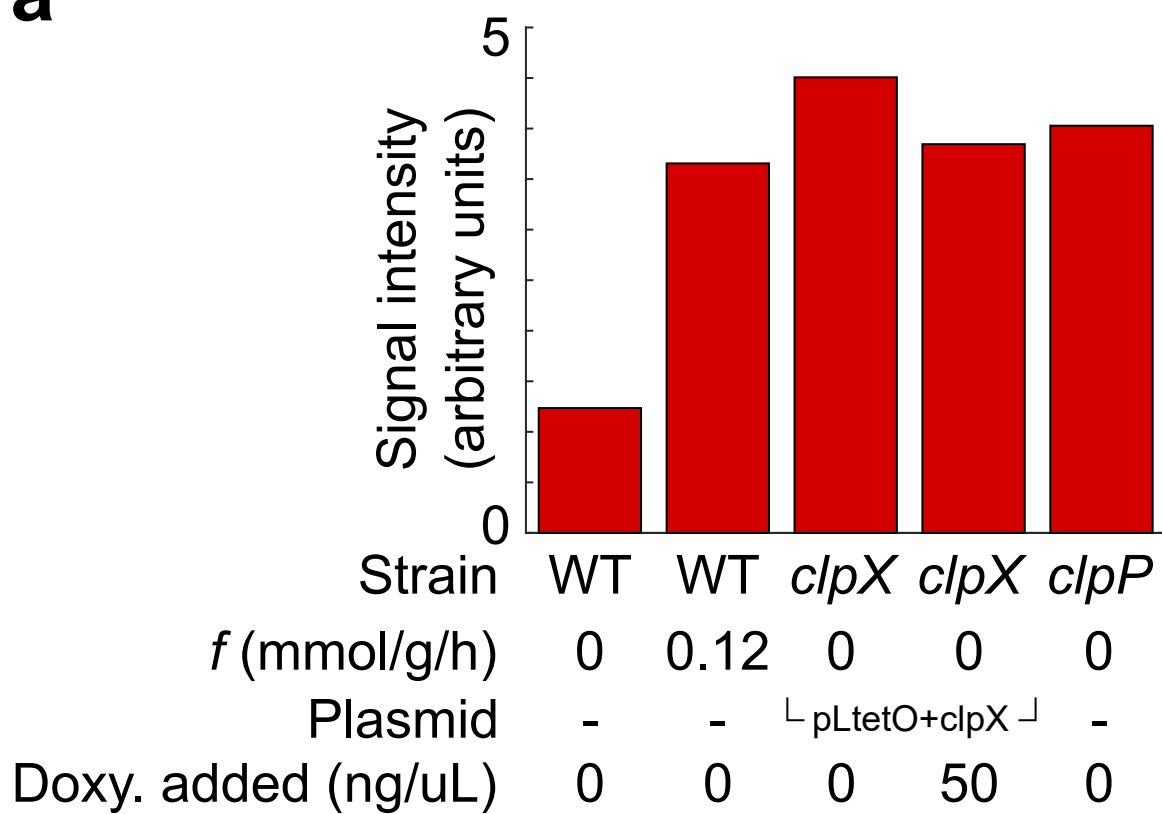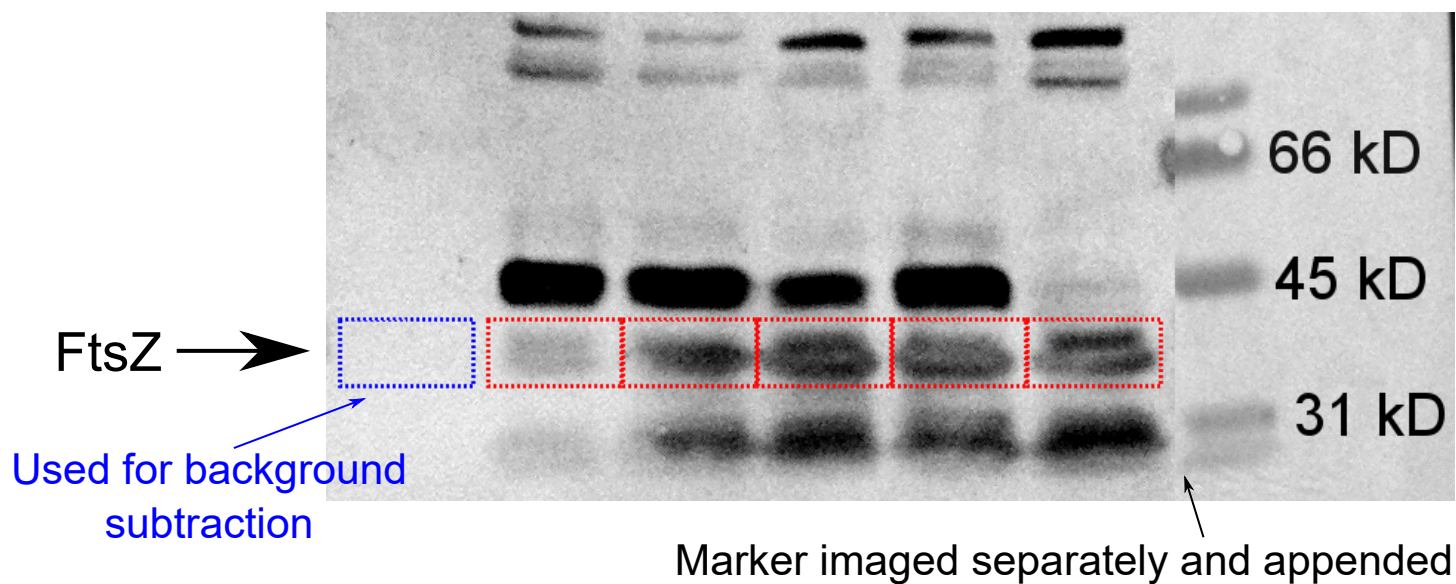**b**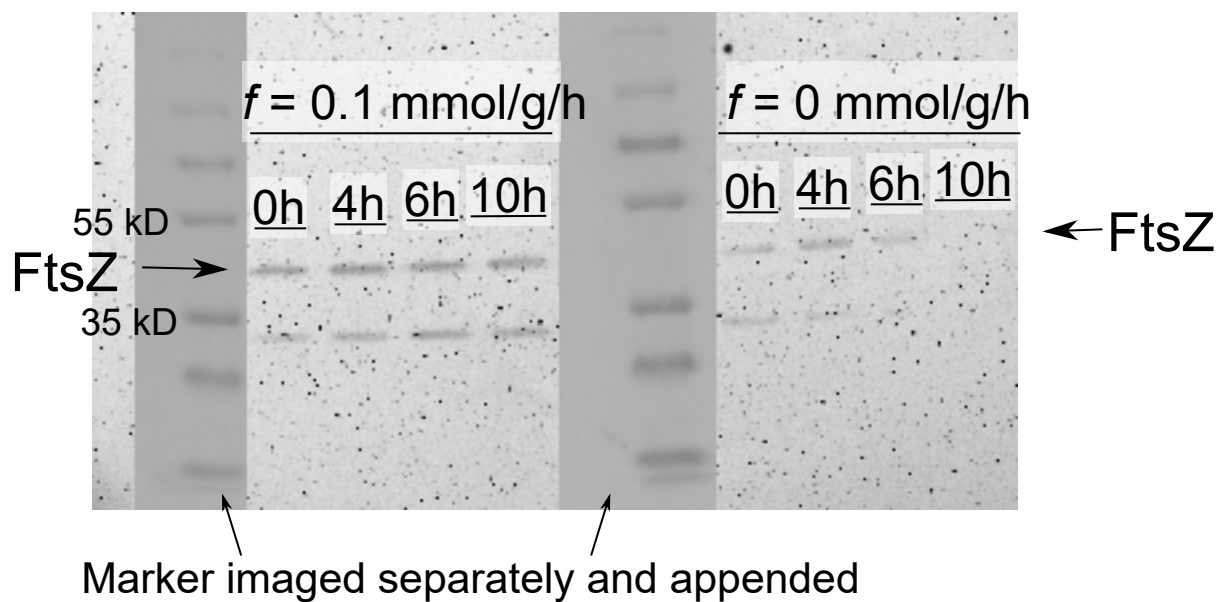

Supplement: Supplementary file [file 314922-8.pdf]
